# Supplementary material for: Design of large π-conjugated α-cyanostilbene derivatives as colorimetric sensors for volatile acids and organic amine gases
Source: Royal Society of Chemistry journal article supplement (doi:10.1039/c9tc06148g), 2020-01-01
Supplement: c9tc06148g1.pdf [file c9tc06148g1.pdf]

## Design of large $\pi$ -conjugated $\alpha$ -cyanostilbenes derivatives as colorimetric sensors for volatile acids and organic amines gases

Xinhua Cao,\* Yiran Li, Qingqing Han, Aiping Gao, Bingya Wang, Xueping Chang and Ji-ting Hou\*

College of Chemistry and Chemical Engineering, Henan Province Key Laboratory of Utilization of Non-metallic Mineral in the South of Henan & Green catalysis and synthesis key laboratory of Xinyang city, Xinyang Normal University, 237 Southlake Road, Xinyang 464000, P. R. China

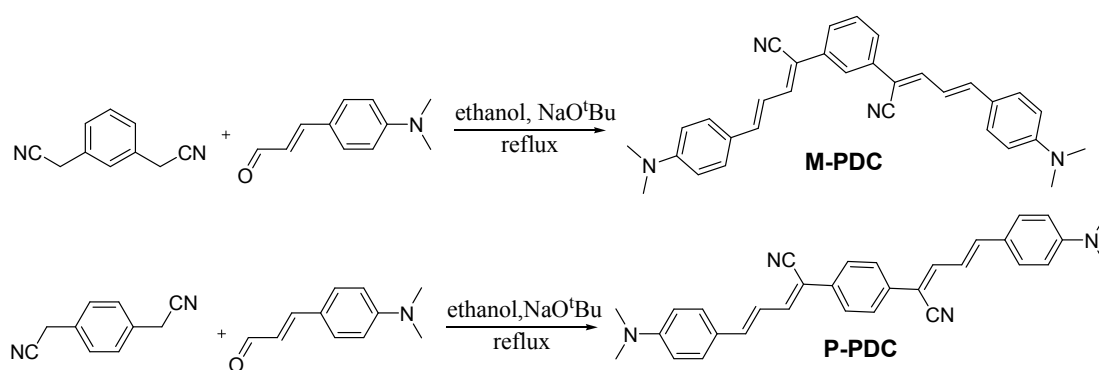

**Scheme S1** The synthesis routine of M-PDC and P-PDC.

**Synthesis of M-PDC:** m-Phenylenediacetonitrile (1.00 g, 6.40 mmol), 4-dimethylaminocinnamaldehyde (2.24 g, 12.80 mmol) and sodium-*t*-butoxide (1.84 g, 19.20 mmol) were added to anhydrous ethanol (25 mL). The mixture was heated to reflux and kept overnight. After the reaction was over, a large precipitate was produced. The precipitate was filtrated and washed with ethanol for many times. The reddish brown powder was obtained with the yield of 70%. <sup>1</sup>HNMR (600 MHz, CDCl<sub>3</sub>): 7.75 (s, 1H), 7.53 (d, *J* = 8.4 Hz, 2H), 7.47 (d, *J* = 8.4 Hz, 6H), 7.41 (t, *J* = 7.8 Hz, 4H), 7.20 (t, *J* = 11.4 Hz, 2H), 7.02 (s, 1H), 6.99 (s, 1H), 6.69 (d, *J* = 9.0 Hz, 4H), 3.03 (s, 12H), <sup>13</sup>CNMR (150 MHz, CDCl<sub>3</sub>): 151.5, 145.7, 143.9, 143.7, 143.1, 140.2, 134.7, 131.2, 129.5, 125.2, 123.7, 120.6, 118.1, 40.3. HRMS calculated for C<sub>32</sub>H<sub>31</sub>N<sub>4</sub> [M+H]<sup>+</sup> 471.2549, found: 471.2548.

**Synthesis of P-PDC:** p-Phenylenediacetonitrile (1.00 g, 6.40 mmol), 4-dimethylaminocinnamaldehyde (2.24 g, 12.80 mmol) and sodium-*t*-butoxide (1.84 g, 19.20 mmol) were added to anhydrous ethanol (25 mL). The mixture was heated to reflux and kept overnight. After the reaction was over, a large precipitate was produced. The precipitate was filtrated and washed with ethanol for many times. The nut-brown powder was obtained with the yield of 77%. <sup>1</sup>HNMR (600 MHz, CDCl<sub>3</sub>): 7.66 (d, *J* = 8.4 Hz, 1H), 7.60 (d, *J* = 4.8 Hz, 2H), 7.53 (d, *J* = 8.4 Hz, 1H), 7.47-7.42 (m, 4H), 7.33 (d, *J* = 8.4 Hz, 1H), 7.22-7.12 (m, 2H), 7.01 (t, *J* = 8.4 Hz, 2H), 6.92 (d, *J* = 15.0 Hz, 1H), 6.74 (d, *J* = 8.4 Hz, 1H), 6.69 (d, *J* = 8.4 Hz, 3H), 6.65 (d, *J* = 8.4 Hz, 1H), 3.03 (s, 12H), <sup>13</sup>CNMR (150 MHz, CDCl<sub>3</sub>): 151.5, 143.1, 142.8, 133.7, 129.6, 129.4, 125.7, 125.5, 123.8, 120.7, 117.8, 40.3. HRMS calculated for C<sub>32</sub>H<sub>31</sub>N<sub>4</sub> [M+H]<sup>+</sup> 471.2549, found: 471.2548.

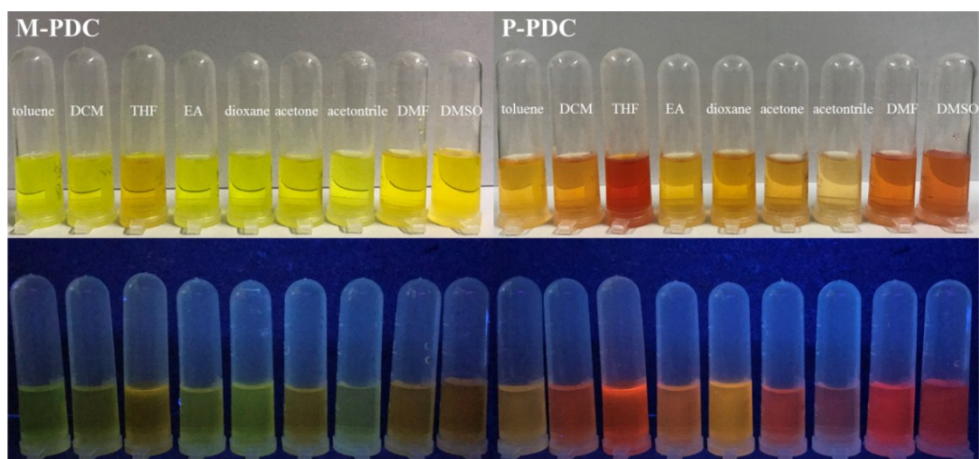

**Fig. S1** The visual images of solutions **M-PDC** and **P-PDC** in different solvents. The upper and lower were under daylight and 365 nm light, respectively. The solution concentration was all  $10^{-5}$  M.

**Table S1** The photophysical properties of **M-PDC** and **P-PDC** in different solvents.

| compound<br>solvent      | Absorption band (nm) |              | Log $\epsilon$ ( $L \text{ mol}^{-1} \text{ cm}^{-1}$ ) |              | Fluorescence intensity (nm) |              |
|--------------------------|----------------------|--------------|---------------------------------------------------------|--------------|-----------------------------|--------------|
|                          | <b>M-PDC</b>         | <b>P-PDC</b> | <b>M-PDC</b>                                            | <b>P-PDC</b> | <b>M-PDC</b>                | <b>P-PDC</b> |
| dioxane                  | 428                  | 469          | 4.84                                                    | 4.81         | 546                         | 580          |
| toluene                  | 435                  | 476          | 4.87                                                    | 4.51         | 543                         | 601          |
| acetonitrile             | 436                  | 472          | 4.80                                                    | 4.18         | 582                         | 656          |
| ethyl acetate            | 426                  | 469          | 5.01                                                    | 4.46         | 557                         | 610          |
| DMF                      | 443                  | 488          | 4.88                                                    | 4.77         | 586                         | 665          |
| THF                      | 432                  | 476          | 4.82                                                    | 4.81         | 562                         | 617          |
| acetone                  | 434                  | 475          | 4.70                                                    | 4.36         | 577                         | 645          |
| $\text{CH}_2\text{Cl}_2$ | 437                  | 474          | 4.46                                                    | 4.73         | 562                         | 617          |
| DMSO                     | 452                  | 489          | 5.05                                                    | 4.84         | 594                         | 674          |

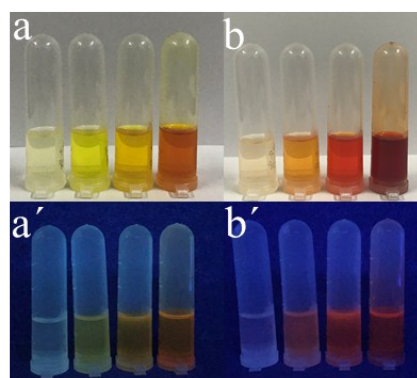

**Fig. S2** The visual images of solutions **M-PDC** (a and a') and **P-PDC** (b and b') in  $\text{CH}_2\text{Cl}_2$  with different concentration. The upper and lower were under daylight and 365 nm light, respectively. The concentration of solution **M-PDC** and **P-PDC** from left to right were  $10^{-6}$ ,  $10^{-5}$ ,  $10^{-4}$  and  $10^{-3}$  M.

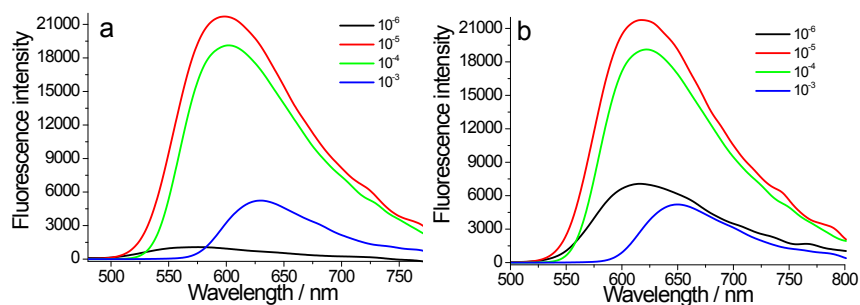

**Fig. S3** Concentration-dependent fluorescence emission spectra of solutions **M-PDC** (a) and **P-PDC** (b) in  $\text{CH}_2\text{Cl}_2$ .

**Table S2** The quantum yields and fluorescence lifetime of **M-PDC** and **P-PDC** in different solvents.

| compound<br>solvent      | QY%   |       | Lifetime (ps) |       |
|--------------------------|-------|-------|---------------|-------|
|                          | M-PDC | P-PDC | M-PDC         | P-PDC |
| dioxane                  | 0.51  | 2.39  | 70            | 201.0 |
| toluene                  | 4.73  | 4.78  | 54            | 211.1 |
| acetonitrile             | 1.14  | 1.87  | 75            | 276.9 |
| ethyl acetate            | --    | 1.39  | 29            | 226.7 |
| DMF                      | 1.53  | 5.03  | 53            | 378.6 |
| THF                      | --    | 1.24  | 48            | 223.9 |
| acetone                  | 1.83  | 2.02  | 58            | 268.9 |
| $\text{CH}_2\text{Cl}_2$ | --    | 1.14  | 39            | 199.7 |
| DMSO                     | 0.18  | 3.96  | 33            | 316.6 |

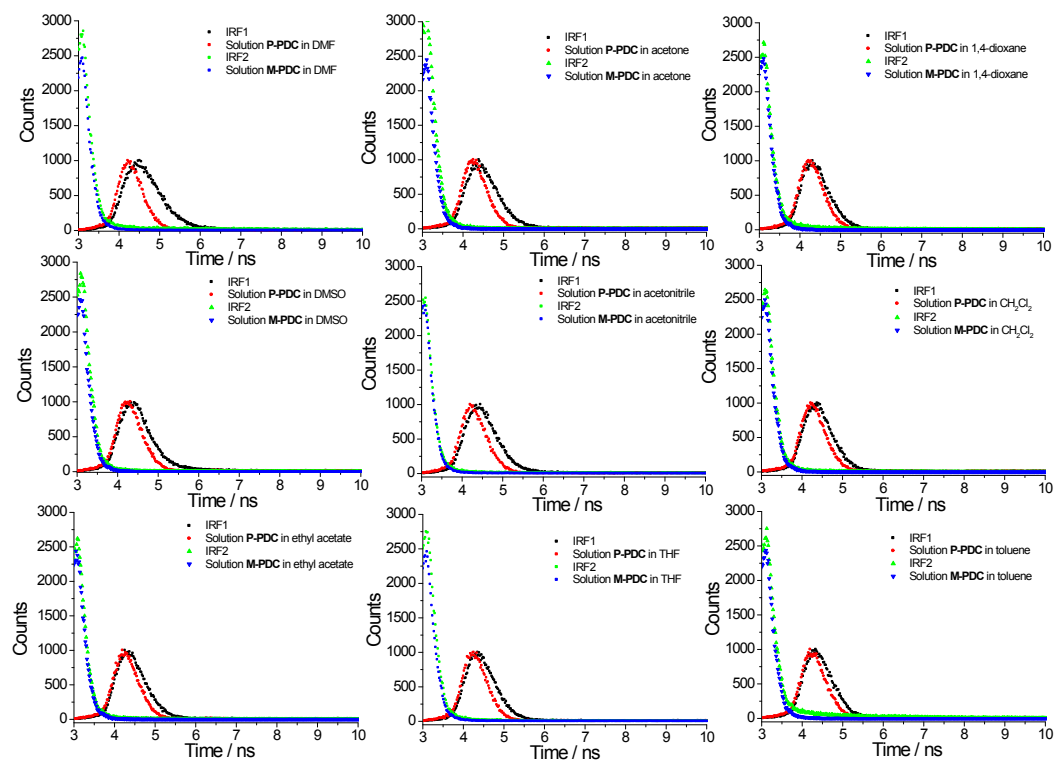

**Fig. S4** Lifetime decay profiles ( $\lambda_{\text{ex}} = 450 \text{ nm}$ , monitored at their maximum emission wavelength) of **M-PDC** and **P-PDC** in different solvents. The solution concentration was all  $10^{-5} \text{ M}$ .

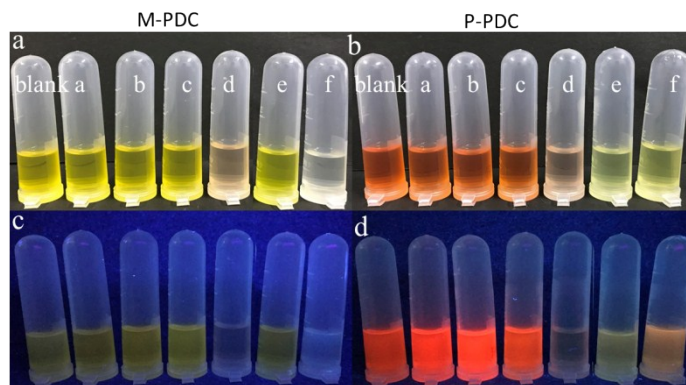

**Fig. S5** The visual images of solutions **M-PDC** and **P-PDC** in  $\text{CH}_2\text{Cl}_2$  with addition of different volatile acids: a) formic acid; b) acetic acid; c) propionic acid; d)  $\text{HNO}_3$ ; e)  $\text{HCl}$ ; f)  $\text{TFA}$ . The solution concentration was all  $10^{-5}$  M.

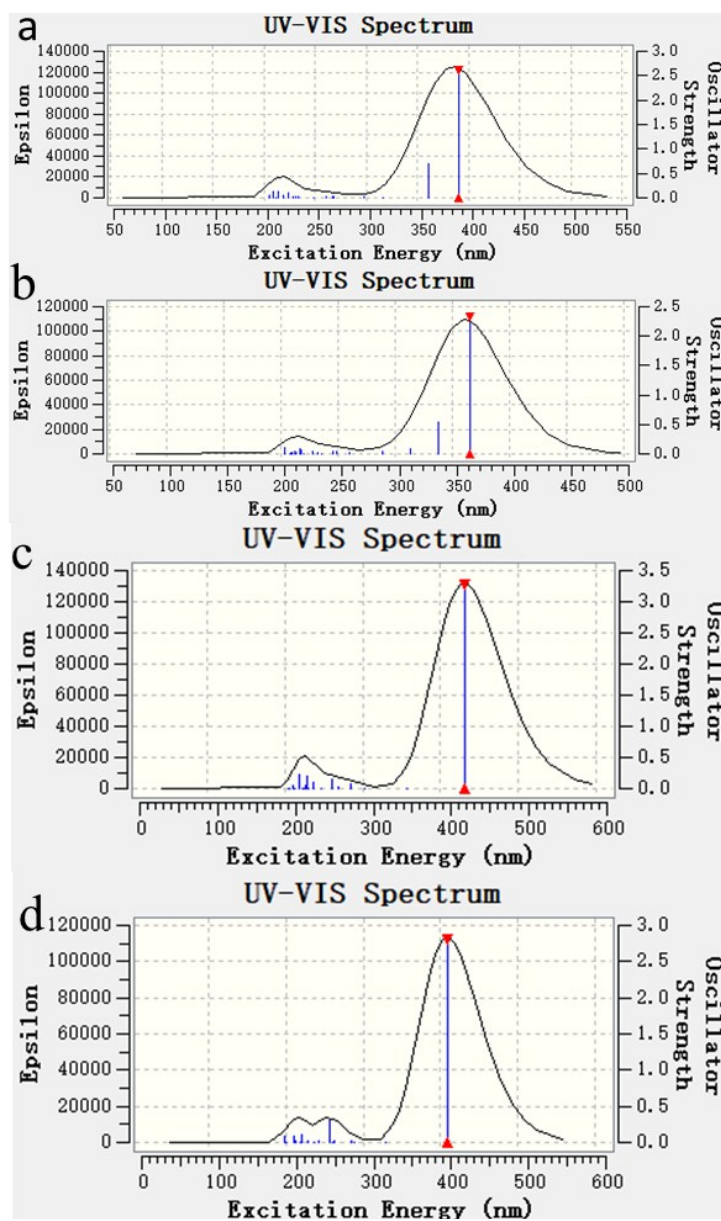

**Fig. S6** The absorption spectra of **M-PDC** and **P-PDC** and complexes **M-PDC-2H** and **M-PDC-2H** obtained from DFT calculation: a) for compound **M-PDC**, b) for complex **M-PDC-2H**, c) for compound **P-PDC**, d) for complex **P-PDC-2H**.

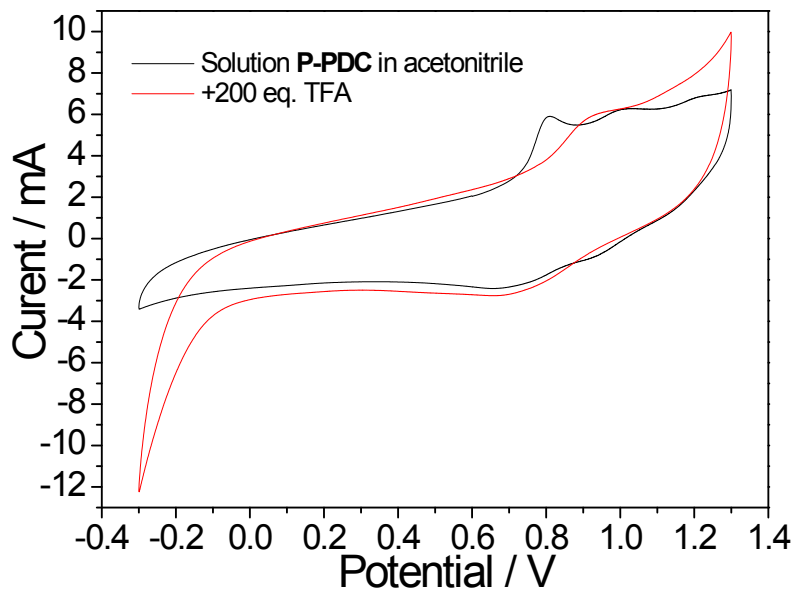

**Fig. S7.** Cyclic voltammograms of solution **P-PDC** ( $10^{-5}$  M) in acetonitrile with gradual addition of TFA in the present of 0.5 M tetrabutylammonium hexafluorophosphate as electrolyte.

**Table S3** Detection limit of **M-PDC** toward TFA and TEA in  $\text{CH}_2\text{Cl}_2$  by absorbance changes at 437 nm

| n                       | 1     | 2     | 3     | 4     | 5     | 6     | 7     | 8     | 9     | 10    | 11    |
|-------------------------|-------|-------|-------|-------|-------|-------|-------|-------|-------|-------|-------|
| Absorbance<br>( $X_n$ ) | 1.739 | 1.740 | 1.739 | 1.739 | 1.738 | 1.739 | 1.740 | 1.738 | 1.738 | 1.740 | 1.741 |

$$X_{\text{average}} = 1.739 \quad \sigma_{\text{wb}} = \text{sqrt}(\sum(X_n - X_{\text{average}})^2/n) = 8.8 \times 10^{-7}$$

$$\text{The detection limit: } [\text{TFA}] = 3\sigma/b = 2.0 \text{ nM}$$

$$[\text{TEA}] = 3\sigma/b = 1.76 \text{ nM}$$

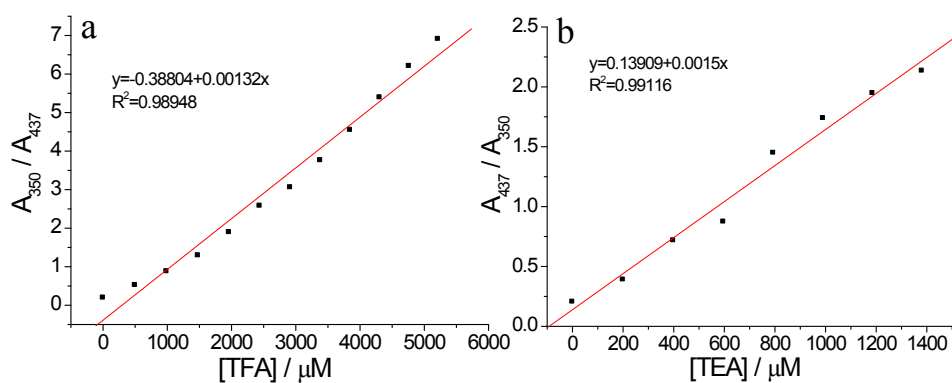

**Fig. S8** The linear fitting curve of absorbance change of **M-PDC** solution with the addition of TFA (a) and **M-PDC** with 550.0 eq. of TFA with addition of TEA (b).

**Table S4** Detection limit of **P-PDC** toward TFA and TEA in  $\text{CH}_2\text{Cl}_2$  by absorbance changes at 485 nm

| n                       | 1     | 2     | 3     | 4     | 5     | 6     | 7     | 8     | 9     | 10    | 11    |
|-------------------------|-------|-------|-------|-------|-------|-------|-------|-------|-------|-------|-------|
| Absorbance<br>( $X_n$ ) | 0.787 | 0.787 | 0.786 | 0.786 | 0.786 | 0.785 | 0.785 | 0.788 | 0.789 | 0.789 | 0.784 |

$$X_{\text{average}} = 0.786545 \quad \sigma_{\text{wb}} = \sqrt{\sum(X_n - X_{\text{average}})^2/n} = 0.00000243$$

The detection limit: [TFA] =  $3\sigma/b = 8.82$  nM

$$[\text{TEA}] = 3\sigma/b = 3.47$$
 nM

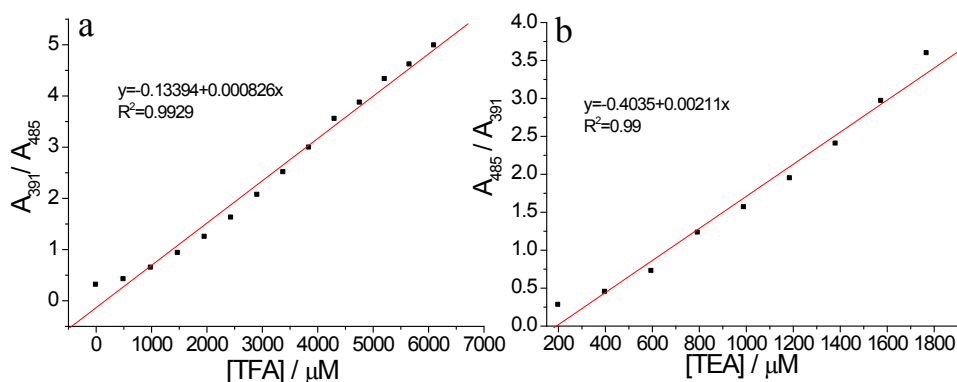

**Fig. S9** The linear fitting curve of absorbance change of solution **P-PDC** with the addition of TFA (a) and **P-PDC** with 650.0 eq. of TFA with addition of TEA.

**Table S5** Detection limit of film **M-PDC+CTAB** toward TFA gas by fluorescence emission changes at 611 nm.

| n                      | 1     | 2     | 3     | 4     | 5     | 6     | 7     | 8     | 9     | 10    | 11    |
|------------------------|-------|-------|-------|-------|-------|-------|-------|-------|-------|-------|-------|
| Intensity<br>( $X_n$ ) | 326.0 | 325.9 | 325.7 | 325.1 | 325.1 | 326.3 | 325.7 | 325.3 | 325.1 | 325.1 | 326.0 |

$$X_{\text{average}} = 325.6 \quad \sigma_{\text{wb}} = \sqrt{\sum(X_n - X_{\text{average}})^2/n} = 0.181983$$

The detection limit: [TFA] =  $3\sigma/b = 17.4$  ppm

**Table S6** Detection limit of film **P-PDC+CTAB** toward TFA gas by fluorescence emission changes at 672 nm

| n                      | 1     | 2     | 3     | 4     | 5     | 6     | 7     | 8     | 9     | 10    | 11    |
|------------------------|-------|-------|-------|-------|-------|-------|-------|-------|-------|-------|-------|
| Intensity<br>( $X_n$ ) | 207.9 | 208.0 | 208.0 | 207.8 | 208.0 | 207.8 | 208.3 | 207.8 | 207.7 | 208.3 | 207.6 |

$$X_{\text{average}} = 207.9 \quad \sigma_{\text{wb}} = \sqrt{\sum(X_n - X_{\text{average}})^2/n} = 0.04561983$$

The detection limit: [TFA] =  $3\sigma/b = 2.37$  ppm

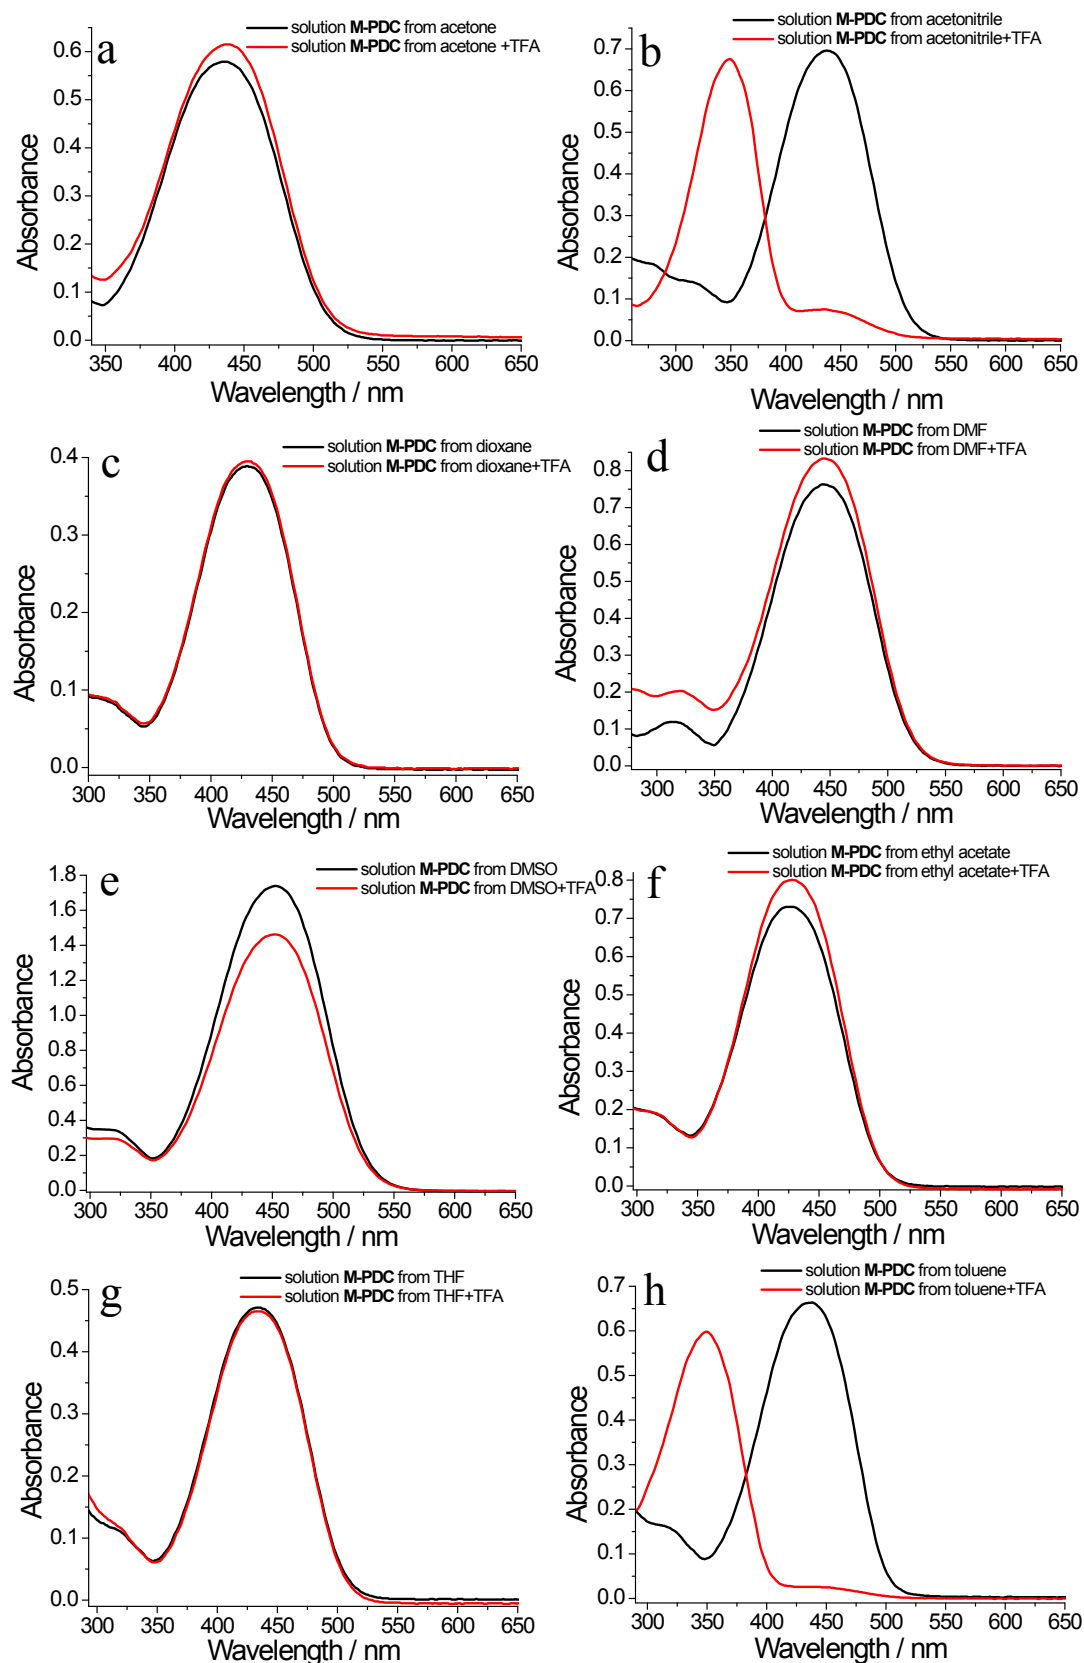

**Fig. S10** UV-vis absorption spectra of solution M-PDC in different solvents before and after addition of 500 eq. of TFA. The concentration of solution M-PDC in different solvents was  $10^{-5}$  M.

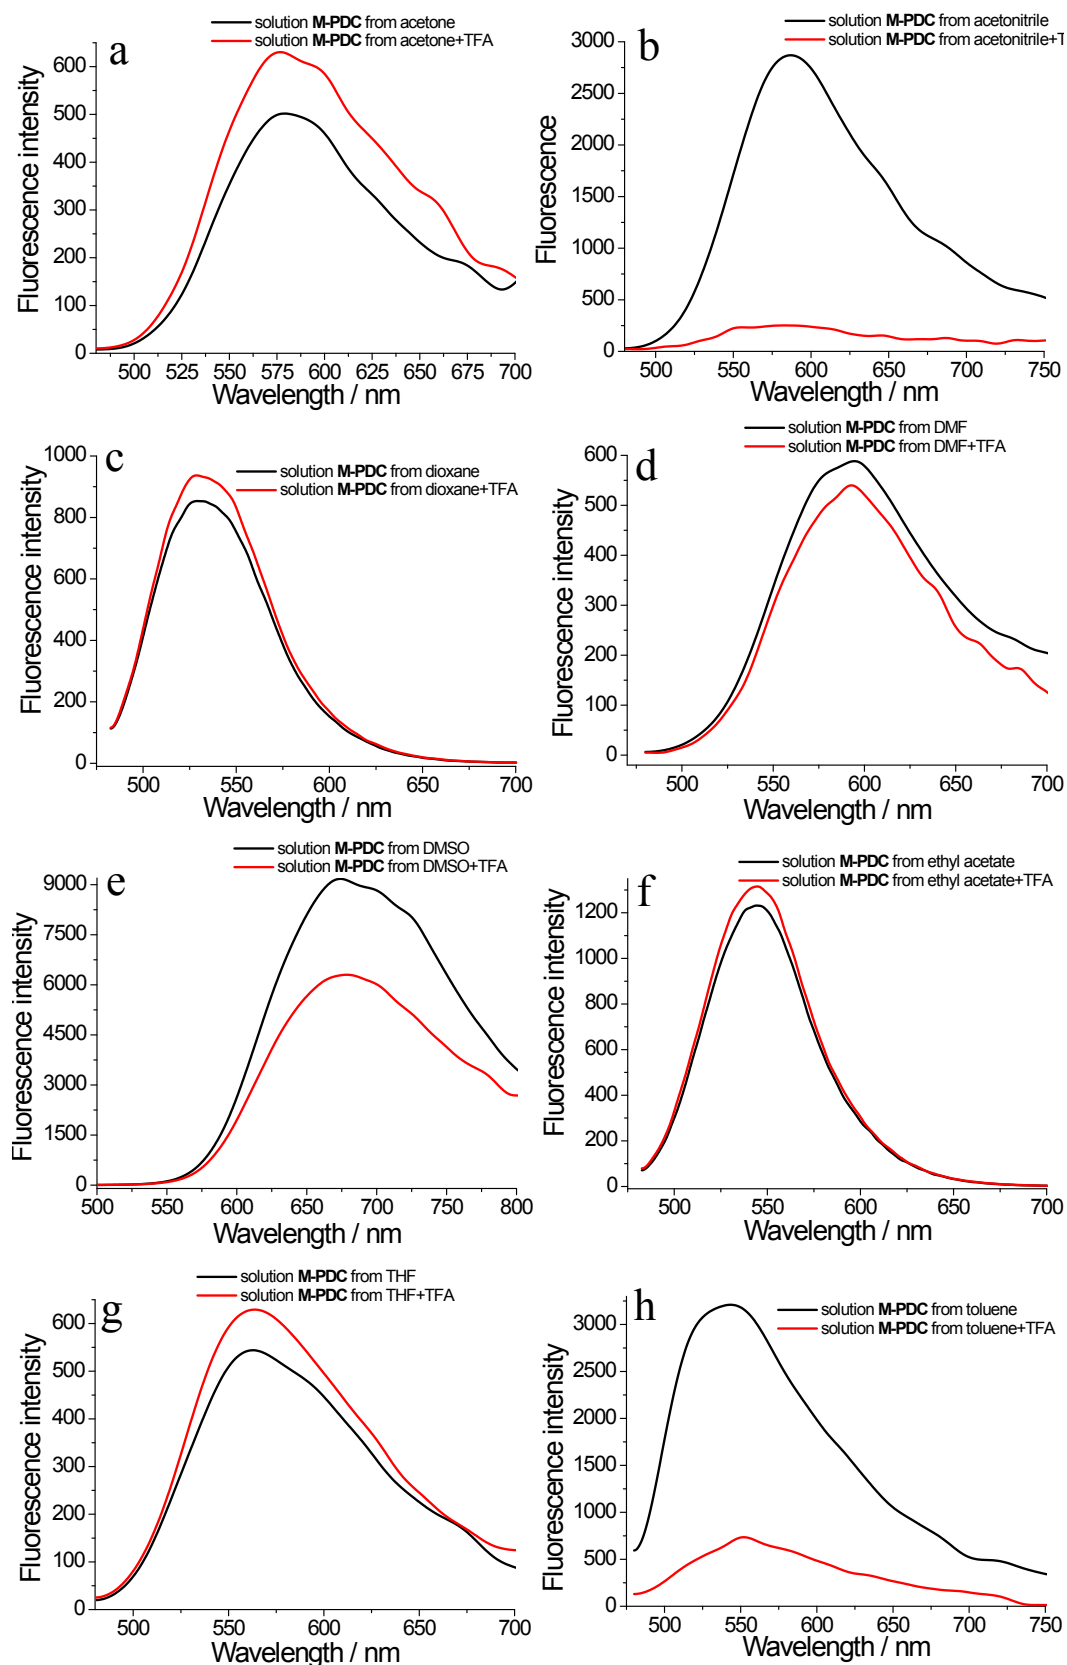

**Fig. S11** Fluorescence emission spectra of solution M-PDC in different solvent before and after addition of 500 eq. of TFA. The concentration of solution M-PDC in different solvents was  $10^{-5}$  M.



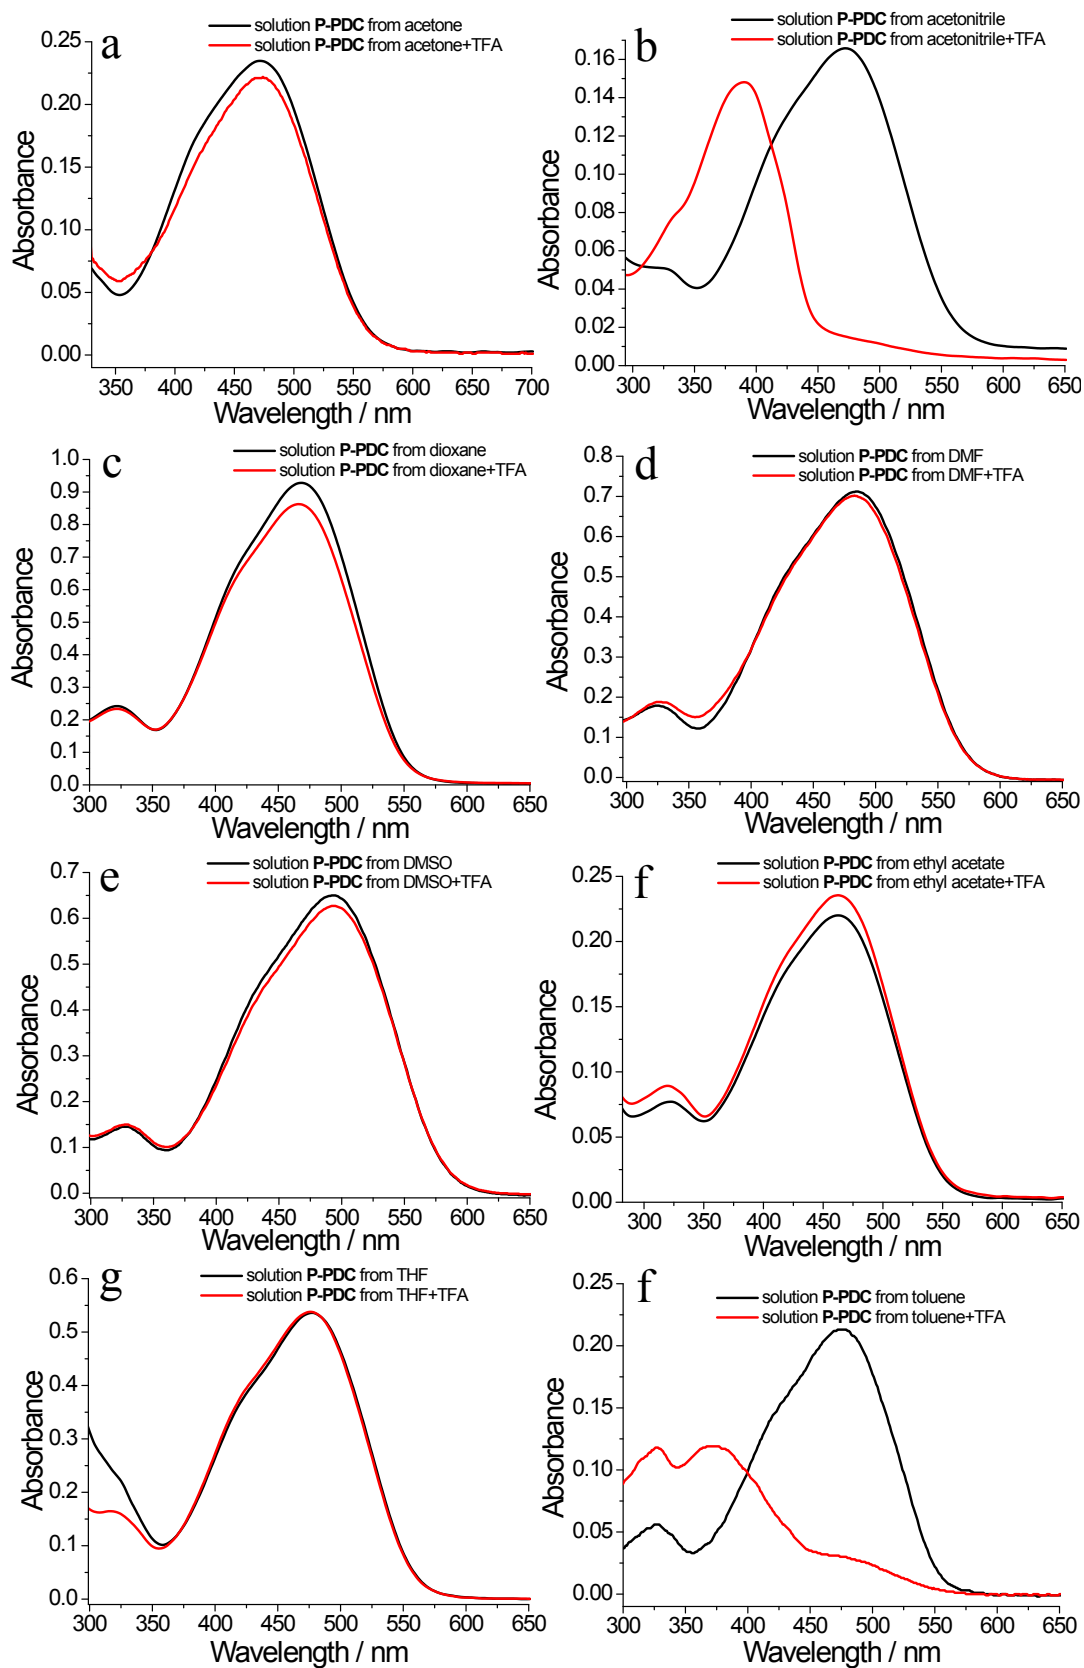

**Fig. S12** UV-vis absorption spectra of solution **P-PDC** in different solvent before and after addition of 500 eq. of TFA. The concentration of solution **P-PDC** in different solvents was  $10^{-5}$  M.

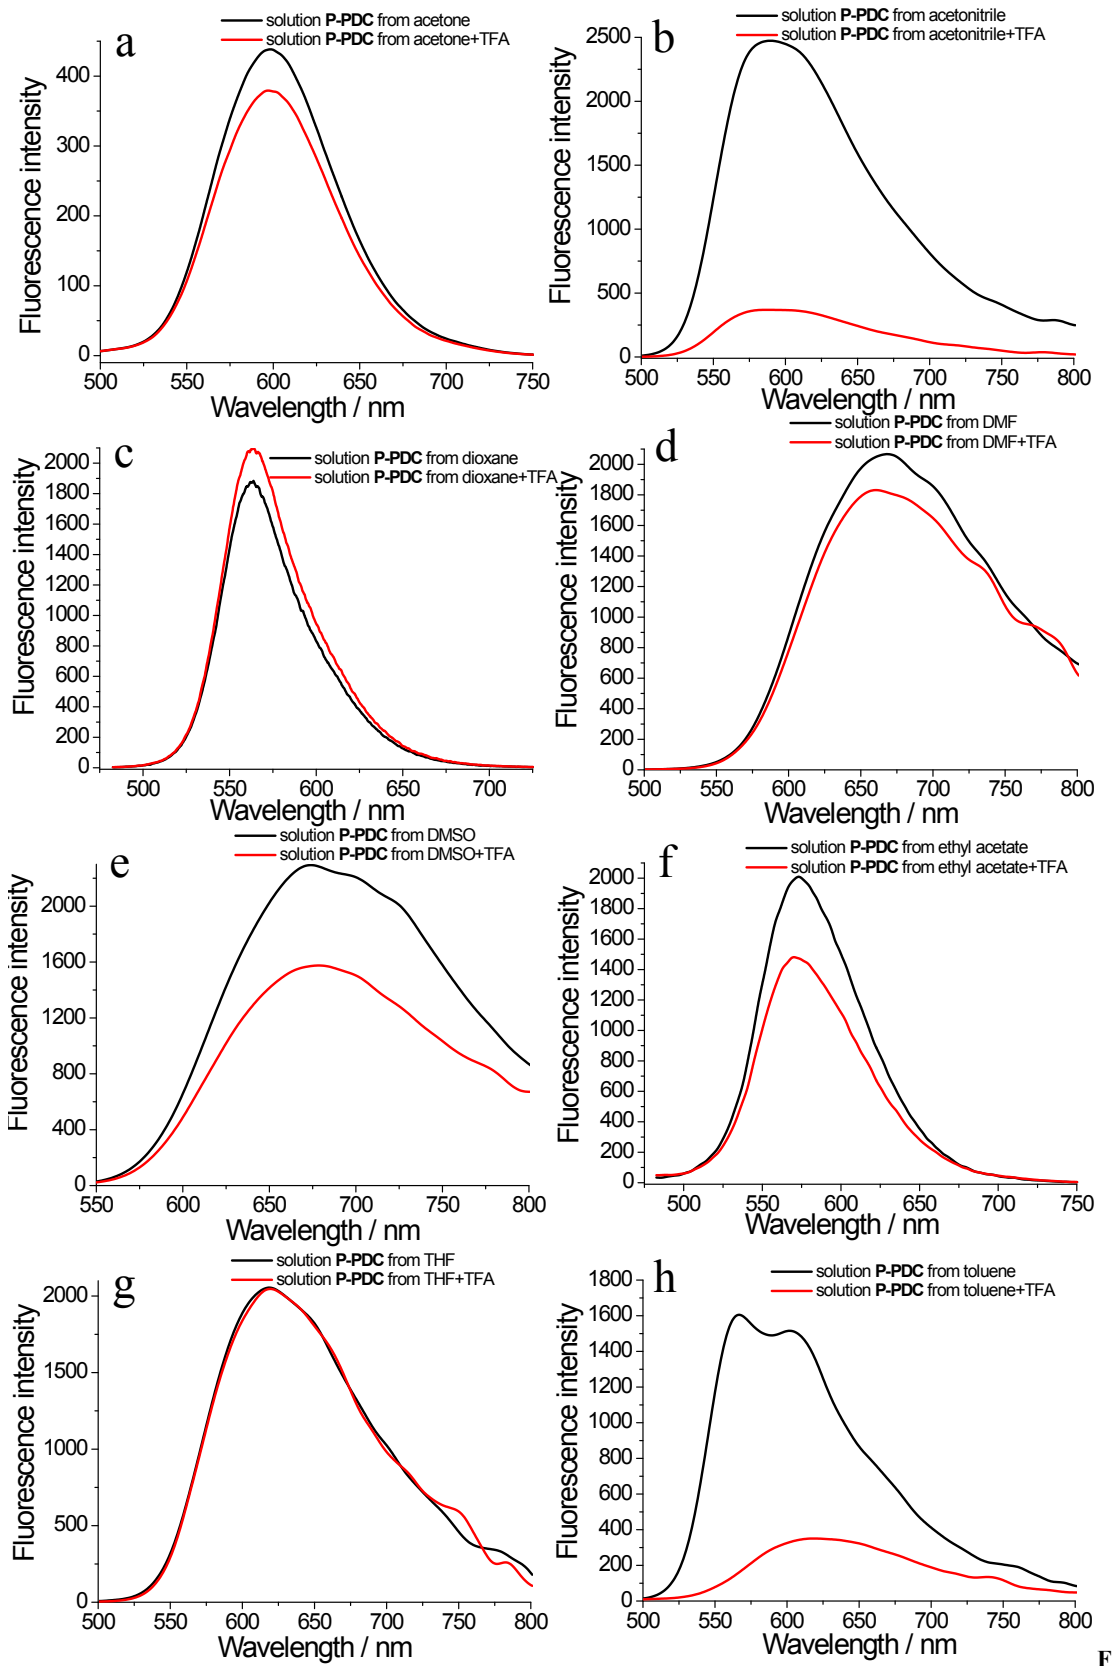

ig. S13 Fluorescence emission spectra of solution P-PDC in different solvent before and after addition of 500 eq. of TFA. The concentration of solution P-PDC in different solvents was  $10^{-5}$  M.

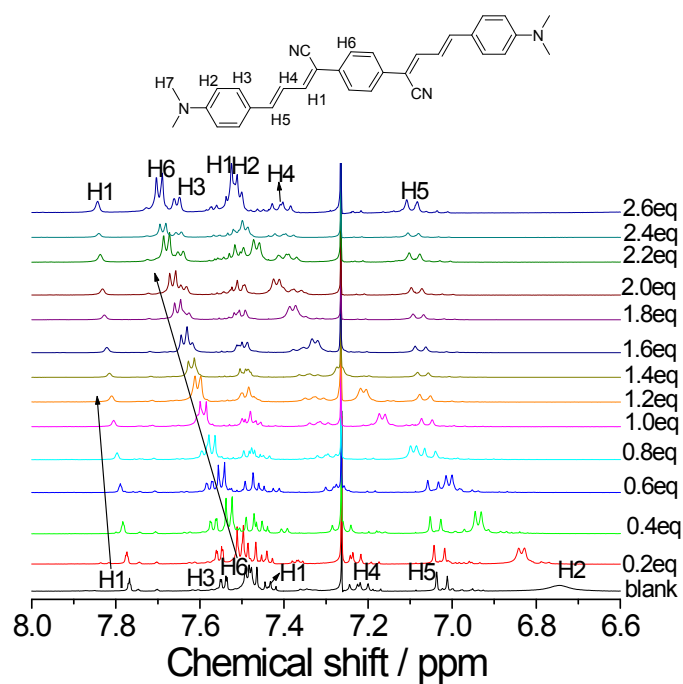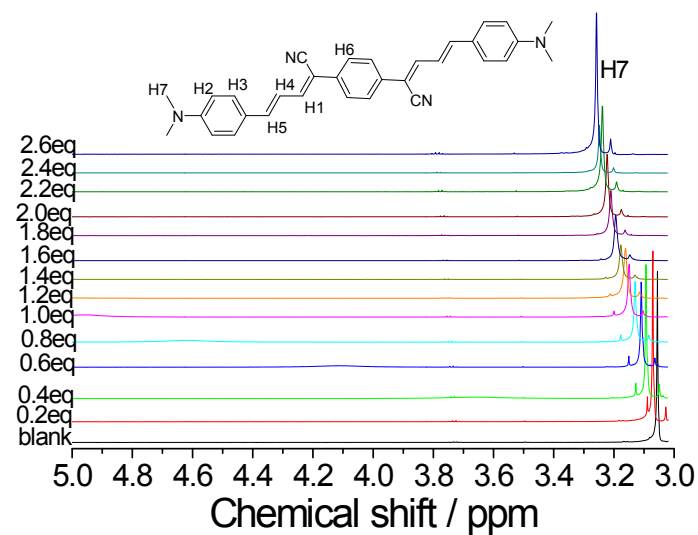

Fig. S14 <sup>1</sup>H NMR titration of P-PDC in CDCl<sub>3</sub> by CF<sub>3</sub>COOH (0-2.6 eq.).

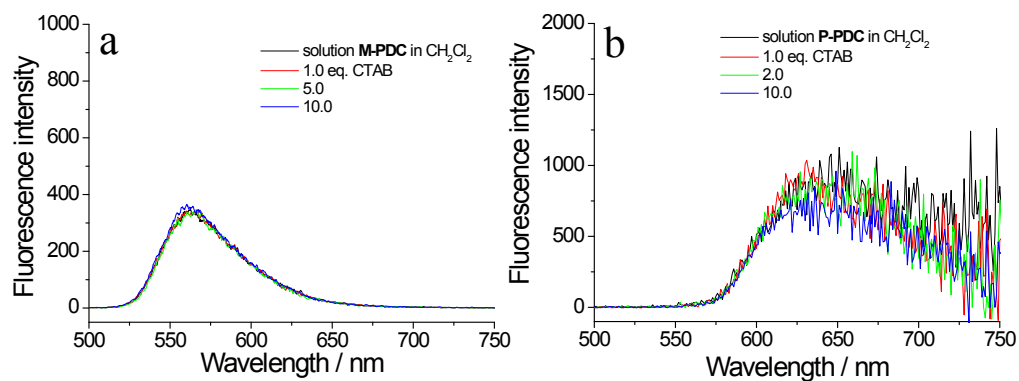

Fig. S15 Fluorescence emission spectra change of solutions M-PDC (a) and P-PDC (b) in CH<sub>2</sub>Cl<sub>2</sub> (10<sup>-3</sup> M)

with addition of different amount of CTAB.

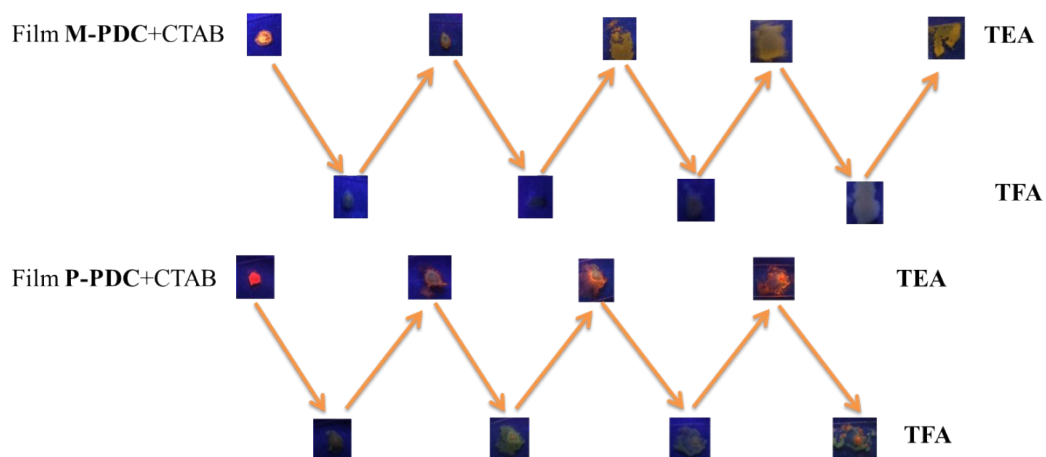

**Fig. S16** Images of films **M-PDC+CTAB** and **P-PDC+CTAB** with contacting TFA and TEA gases in turn.

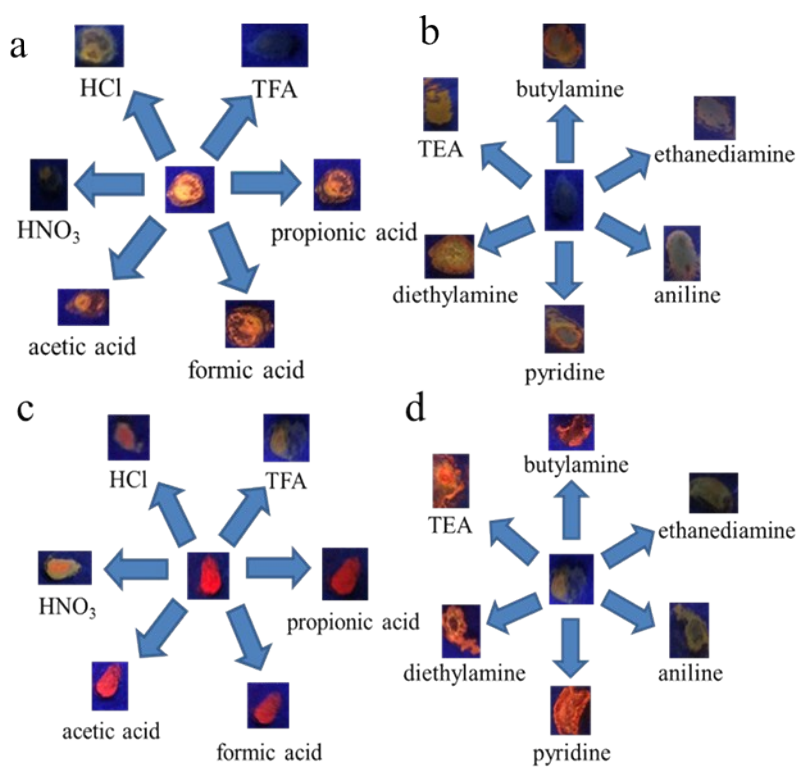

**Fig. S17** Images of film **M-PDC+CTAB** (a and b) and **P-PDC+CTAB** (c and d) from  $\text{CH}_2\text{Cl}_2$  with different gaseous acids and then organic amine vapors.

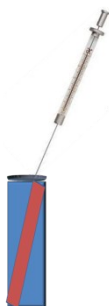

**Fig. S18** The schematic of the test device.
